# Supplementary material for: Targeting the heme proteins hemoglobin and myoglobin by janus green blue and study of the dye–protein association by spectroscopy and calorimetry
Source: Royal Society of Chemistry journal article supplement (doi:10.1039/c4ra06600f), 2014-01-01
Supplement: c4ra06600f1.pdf [file c4ra06600f1.pdf]

## Targeting the heme proteins hemoglobin and myoglobin by Janus green blue and study of the dye-protein association by spectroscopy and calorimetry<sup>†</sup>

Sabyasachi Chatterjee and Gopinatha Suresh Kumar\*  
Biophysical Chemistry Laboratory, Chemistry Division  
CSIR-Indian Institute of Chemical Biology  
Kolkata 700 032, India

### Supplementary Data

**Table S1** Data derived from 3-D fluorescence of heme proteins and heme proteins-JGB complexes.

| System  | Peaks               | Peak position $\lambda_{ex}/\lambda_{em}$<br>(nm/nm) | Stokes Shift<br>(nm) | Intensity<br>(F) |
|---------|---------------------|------------------------------------------------------|----------------------|------------------|
| Hb      | Fluorescence peak 1 | 280/338                                              | 58                   | 103.0            |
|         | Fluorescence peak 2 | 230/336                                              | 106                  | 96.4             |
| Hb +JGB | Fluorescence peak 1 | 280/341                                              | 61                   | 19.0             |
|         | Fluorescence peak 2 | 230/340                                              | 100                  | 29.9             |
| Mb      | Fluorescence peak 1 | 280/332                                              | 52                   | 66.5             |
|         | Fluorescence peak 2 | 230/331                                              | 101                  | 51.1             |
| Mb+ JGB | Fluorescence peak 1 | 280/333                                              | 53                   | 7.3              |
|         | Fluorescence peak 2 | 230/335                                              | 105                  | 10.0             |

| <b>Table S2</b> pH dependent $K_{sv}$ data on JGB–heme protein copmplexation |                                           |                                           |
|------------------------------------------------------------------------------|-------------------------------------------|-------------------------------------------|
| pH                                                                           | Hb ( $K_{sv} \times 10^4 \text{M}^{-1}$ ) | Mb ( $K_{sv} \times 10^4 \text{M}^{-1}$ ) |
| 6.4                                                                          | 7.9                                       | 9.4                                       |
| 7.4                                                                          | 6.2                                       | 8.7                                       |
| 8.4                                                                          | 5.7                                       | 8.1                                       |

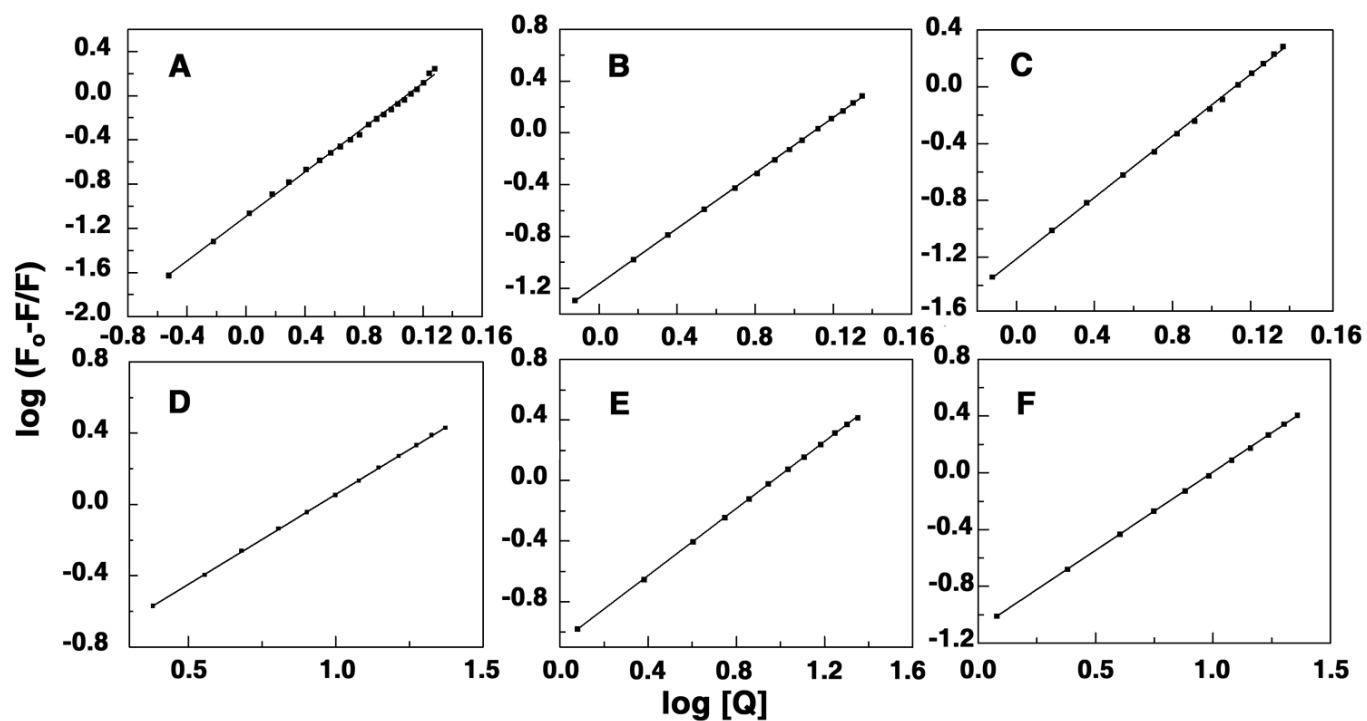

**Fig. S1** Temperature dependent plot of Log  $F_o - F/F$  versus  $\log [Q]$  for the binding of JGB with Hb and Mb. The upper panels (A-C) represent the data for JGB-Hb and lower panel for JGB-Mb (D-F) at temperature 288.15, 303.15 and 318.15K, respectively.
